# Supplementary material for: Comparative In Vitro Toxicology of Novel Cytoprotective Short-Chain Naphthoquinones
Source: MDPI journal article supplement (doi:10.3390/ph13080184), 2020-08-07
Supplement: s1 [file s1]

## Comparative In Vitro Toxicology of Novel Cytoprotective Short-Chain Naphthoquinones

Zikai Feng <sup>1,2,\*</sup>, Mohammed Sedeeq <sup>1</sup>, Abraham Daniel <sup>1</sup>, Monika Corban <sup>1</sup>, Krystel L. Woolley <sup>2</sup>, Ryan Condie <sup>2</sup>, Iman Azimi <sup>1</sup>, Jason A. Smith <sup>2</sup> and Nuri Gueven <sup>1,\*</sup>

<sup>1</sup> School of Pharmacy and Pharmacology, University of Tasmania, Hobart, TAS 7005, Australia; mohammed.sedeeq@utas.edu.au (M.S.); abraham.daniel@utas.edu.au (A.D.); monika.corban@utas.edu.au (M.C.); iman.azimi@utas.edu.au (I.A.)

<sup>2</sup> School of Natural Sciences, University of Tasmania, Hobart, TAS 7005, Australia; krystel.woolley@utas.edu.au (K.L.W.); ryan.condie@utas.edu.au (R.C.); jason.smith@utas.edu.au (J.A.S.)

\* Correspondence: zikai.feng@utas.edu.au (Z.F.); nuri.gueven@utas.edu.au (N.G.)

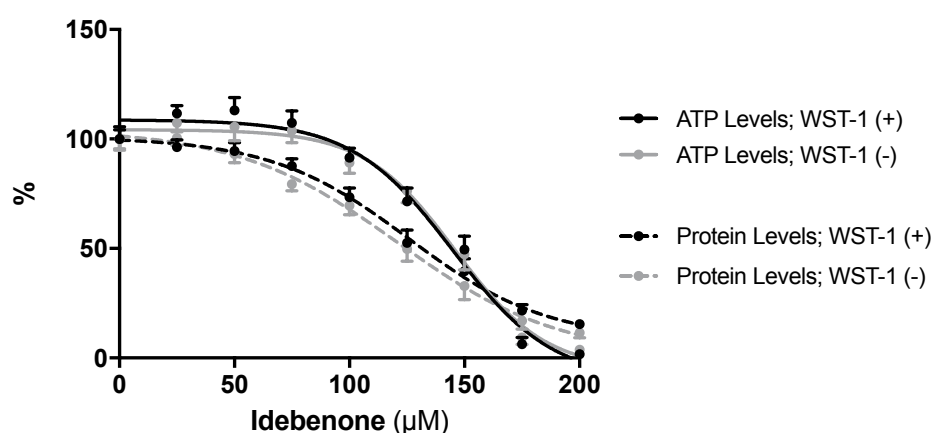

**Figure S1.** Validation of multiplex detection of NAD(P)H, ATP and Protein Levels. Cells were exposed to idebenone (0–200 μM) for 24 h before WST-1 absorption, ATP levels and protein contents were quantified. Data represents mean ± standard error of mean (SEM) from 3 independent experiments with 4 parallel wells per experiment. Two-way ANOVA was performed, no statistically significant differences were observed over a range of concentrations with (black lines) or without (gray lines) NAD(P)H measurement prior to the quantitation of ATP (solid lines) and protein (dotted lines) content from cell lysates.

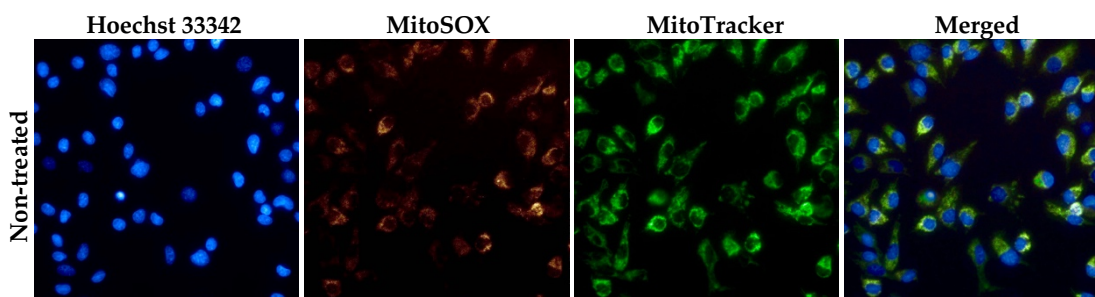

**Figure S2.** Exemplary images of MitoSOX localization in HepG2 cells used to measure mitochondrial superoxide production. Cells were seeded on poly-L-lysine pre-coated plates, left to adhere, loaded with MitoSOX Red and Hoechst 33342 (methods detailed in main text 4.6) and MitoTracker Green (0.1 μM in HBSS + 1% BSA, 30 μL/well; M7514, Thermo Fisher Scientific, Scoresby, VIC, Australia) to confirm mitochondrial localization, and imaged using an IN Cell 2200 analyzer (60 × magnification, GE Healthcare, Rydalmere, NSW, Australia).

**Table S1.** Effect of test compounds on WST-1 absorption.

| $\mu\text{M}$ | 0               | 25              | 50              | 75              | 100             | 125             | 150            | 175            | 200            |
|---------------|-----------------|-----------------|-----------------|-----------------|-----------------|-----------------|----------------|----------------|----------------|
| Idebenone     | 100.0 $\pm$ 2.1 | 106.9 $\pm$ 3.3 | 122.4 $\pm$ 4.8 | 136.9 $\pm$ 6.9 | 124.6 $\pm$ 7.5 | 114.0 $\pm$ 8.7 | 75.9 $\pm$ 8.0 | 40.8 $\pm$ 4.9 | 30.5 $\pm$ 1.7 |
| 1             | 100.0 $\pm$ 2.8 | 119.8 $\pm$ 3.6 | 86.9 $\pm$ 3.4  | 34.8 $\pm$ 5.7  | 21.7 $\pm$ 1.2  | 19.6 $\pm$ 0.6  | 19.8 $\pm$ 0.7 | 19.7 $\pm$ 0.5 | 19.0 $\pm$ 0.5 |
| 2             | 100.0 $\pm$ 3.2 | 120.8 $\pm$ 7.2 | 48.7 $\pm$ 2.8  | 26.9 $\pm$ 1.9  | 19.7 $\pm$ 0.8  | 18.3 $\pm$ 0.7  | 18.3 $\pm$ 0.7 | 18.8 $\pm$ 0.8 | 18.9 $\pm$ 0.9 |
| 3             | 100.0 $\pm$ 4.5 | 87.2 $\pm$ 2.9  | 81.1 $\pm$ 4.9  | 66.8 $\pm$ 3.9  | 55.2 $\pm$ 2.6  | 46.6 $\pm$ 1.2  | 43.4 $\pm$ 0.8 | 41.6 $\pm$ 0.8 | 41.2 $\pm$ 0.9 |
| 4             | 100.0 $\pm$ 5.0 | 111.8 $\pm$ 6.6 | 107.0 $\pm$ 3.9 | 104.7 $\pm$ 2.7 | 97.6 $\pm$ 3.3  | 95.9 $\pm$ 4.2  | 92.3 $\pm$ 4.5 | 88.0 $\pm$ 2.8 | 84.7 $\pm$ 2.6 |
| 5             | 100.0 $\pm$ 2.8 | 111.9 $\pm$ 4.6 | 126.7 $\pm$ 4.7 | 112.4 $\pm$ 2.2 | 112.9 $\pm$ 3.3 | 105.6 $\pm$ 2.7 | 93.3 $\pm$ 4.3 | 77.9 $\pm$ 3.0 | 67.9 $\pm$ 3.0 |
| 6             | 100.0 $\pm$ 1.9 | 116.0 $\pm$ 2.8 | 104.5 $\pm$ 2.2 | 53.9 $\pm$ 2.4  | 34.2 $\pm$ 2.5  | 29.1 $\pm$ 1.5  | 27.3 $\pm$ 1.4 | 27.2 $\pm$ 1.7 | 26.1 $\pm$ 1.3 |
| 7             | 100.0 $\pm$ 3.4 | 121.3 $\pm$ 5.6 | 100.1 $\pm$ 4.8 | 85.2 $\pm$ 5.7  | 57.9 $\pm$ 1.2  | 54.4 $\pm$ 2.0  | 52.9 $\pm$ 1.0 | 49.5 $\pm$ 1.2 | 47.3 $\pm$ 0.5 |
| 8             | 100.0 $\pm$ 1.8 | 83.2 $\pm$ 2.6  | 78.7 $\pm$ 4.5  | 70.9 $\pm$ 3.0  | 50.3 $\pm$ 1.6  | 42.4 $\pm$ 1.3  | 42.4 $\pm$ 1.1 | 40.3 $\pm$ 1.0 | 40.1 $\pm$ 0.8 |
| 9             | 100.0 $\pm$ 3.9 | 115.4 $\pm$ 3.4 | 80.5 $\pm$ 3.9  | 39.9 $\pm$ 2.3  | 32.8 $\pm$ 2.7  | 30.2 $\pm$ 2.9  | 29.4 $\pm$ 2.4 | 31.0 $\pm$ 2.2 | 30.3 $\pm$ 2.0 |
| 10            | 100.0 $\pm$ 2.9 | 114.4 $\pm$ 3.1 | 67.6 $\pm$ 2.9  | 49.5 $\pm$ 4.3  | 38.4 $\pm$ 1.9  | 34.3 $\pm$ 1.2  | 35.2 $\pm$ 0.9 | 34.6 $\pm$ 1.3 | 34.4 $\pm$ 1.1 |
| 11            | 100.0 $\pm$ 1.6 | 89.0 $\pm$ 2.3  | 84.7 $\pm$ 3.8  | 78.2 $\pm$ 3.2  | 65.3 $\pm$ 2.7  | 48.8 $\pm$ 2.2  | 42.2 $\pm$ 2.2 | 40.3 $\pm$ 2.4 | 38.5 $\pm$ 2.9 |

Data was standardized and expressed as mean  $\pm$  SEM (%) of 3 independent experiments with 6 parallel wells per experiment.

**Table S2.** Effect of test compounds on ATP levels.

| $\mu\text{M}$ | 0               | 25              | 50              | 75              | 100             | 125            | 150            | 175            | 200            |
|---------------|-----------------|-----------------|-----------------|-----------------|-----------------|----------------|----------------|----------------|----------------|
| Idebenone     | 100.0 $\pm$ 5.4 | 111.1 $\pm$ 3.4 | 112.4 $\pm$ 5.6 | 106.8 $\pm$ 5.1 | 91.5 $\pm$ 4.2  | 72.2 $\pm$ 6.0 | 50.9 $\pm$ 6.0 | 9.6 $\pm$ 3.1  | 5.3 $\pm$ 0.6  |
| 1             | 100.0 $\pm$ 1.9 | 109.9 $\pm$ 4.6 | 61.4 $\pm$ 4.7  | 21.4 $\pm$ 3.9  | 4.8 $\pm$ 1.6   | 0.7 $\pm$ 0.2  | 0.6 $\pm$ 0.2  | 0.2 $\pm$ 0.1  | 2.3 $\pm$ 0.6  |
| 2             | 100.0 $\pm$ 2.3 | 96.5 $\pm$ 4.5  | 51.4 $\pm$ 5.7  | 22.5 $\pm$ 4.0  | 7.3 $\pm$ 1.7   | 1.7 $\pm$ 0.6  | 1.7 $\pm$ 1.3  | 0.1 $\pm$ 0.1  | 0.8 $\pm$ 0.4  |
| 3             | 100.0 $\pm$ 5.4 | 100.1 $\pm$ 4.3 | 82.6 $\pm$ 4.8  | 71.2 $\pm$ 3.7  | 49.9 $\pm$ 2.0  | 39.8 $\pm$ 2.3 | 30.3 $\pm$ 2.9 | 23.2 $\pm$ 3.4 | 23.7 $\pm$ 4.0 |
| 4             | 100.0 $\pm$ 4.3 | 107.0 $\pm$ 5.9 | 92.8 $\pm$ 5.0  | 98.3 $\pm$ 4.4  | 88.1 $\pm$ 6.1  | 83.3 $\pm$ 5.7 | 90.4 $\pm$ 5.0 | 92.0 $\pm$ 5.3 | 75.6 $\pm$ 3.7 |
| 5             | 100.0 $\pm$ 2.5 | 108.2 $\pm$ 3.2 | 106.9 $\pm$ 3.9 | 106.5 $\pm$ 3.7 | 105.5 $\pm$ 3.9 | 92.8 $\pm$ 4.3 | 84.7 $\pm$ 3.8 | 70.8 $\pm$ 3.0 | 60.9 $\pm$ 3.9 |
| 6             | 100.0 $\pm$ 2.9 | 103.1 $\pm$ 4.9 | 78.2 $\pm$ 2.8  | 41.3 $\pm$ 3.5  | 14.0 $\pm$ 3.0  | 5.1 $\pm$ 0.5  | 4.0 $\pm$ 0.6  | 4.5 $\pm$ 0.9  | 5.2 $\pm$ 0.6  |
| 7             | 100.0 $\pm$ 2.4 | 112.5 $\pm$ 3.8 | 93.5 $\pm$ 4.1  | 66.4 $\pm$ 3.6  | 51.2 $\pm$ 2.1  | 41.1 $\pm$ 1.9 | 37.7 $\pm$ 1.0 | 33.3 $\pm$ 1.5 | 25.7 $\pm$ 1.3 |
| 8             | 100.0 $\pm$ 2.2 | 90.8 $\pm$ 1.9  | 87.5 $\pm$ 4.2  | 78.0 $\pm$ 4.9  | 45.8 $\pm$ 3.8  | 26.7 $\pm$ 2.0 | 22.9 $\pm$ 1.9 | 21.4 $\pm$ 1.0 | 19.3 $\pm$ 1.7 |
| 9             | 100.0 $\pm$ 6.2 | 100.5 $\pm$ 6.8 | 57.3 $\pm$ 4.0  | 22.1 $\pm$ 2.5  | 15.7 $\pm$ 3.2  | 9.0 $\pm$ 2.1  | 6.8 $\pm$ 1.5  | 8.2 $\pm$ 1.0  | 6.8 $\pm$ 0.6  |
| 10            | 100.0 $\pm$ 3.7 | 93.1 $\pm$ 3.2  | 57.6 $\pm$ 4.1  | 27.0 $\pm$ 4.0  | 6.1 $\pm$ 1.5   | 3.1 $\pm$ 1.0  | 3.0 $\pm$ 0.7  | 4.2 $\pm$ 0.8  | 6.8 $\pm$ 1.2  |
| 11            | 100.0 $\pm$ 2.8 | 97.6 $\pm$ 3.7  | 95.0 $\pm$ 3.0  | 80.5 $\pm$ 4.0  | 58.5 $\pm$ 2.0  | 37.9 $\pm$ 2.9 | 28.8 $\pm$ 2.0 | 26.2 $\pm$ 1.8 | 19.5 $\pm$ 1.0 |

Data was standardized and expressed as mean  $\pm$  SEM (%) of 3 independent experiments with 6 parallel wells per experiment.

**Table S3.** Effect of test compounds on protein levels.

| $\mu\text{M}$ | 0               | 25              | 50             | 75             | 100            | 125            | 150            | 175            | 200            |
|---------------|-----------------|-----------------|----------------|----------------|----------------|----------------|----------------|----------------|----------------|
| Idebenone     | 100.0 $\pm$ 4.2 | 96.3 $\pm$ 3.3  | 94.5 $\pm$ 3.9 | 87.7 $\pm$ 3.3 | 73.4 $\pm$ 4.2 | 52.6 $\pm$ 5.8 | 39.6 $\pm$ 5.6 | 21.7 $\pm$ 2.7 | 15.4 $\pm$ 1.3 |
| 1             | 100.0 $\pm$ 1.9 | 98.3 $\pm$ 1.5  | 74.5 $\pm$ 1.4 | 44.4 $\pm$ 3.3 | 27.5 $\pm$ 1.8 | 23.3 $\pm$ 0.9 | 25.9 $\pm$ 2.1 | 20.3 $\pm$ 0.5 | 24.1 $\pm$ 1.1 |
| 2             | 100.0 $\pm$ 1.7 | 93.2 $\pm$ 1.9  | 66.7 $\pm$ 3.4 | 46.7 $\pm$ 3.4 | 36.6 $\pm$ 2.8 | 28.8 $\pm$ 1.0 | 33.8 $\pm$ 3.0 | 28.1 $\pm$ 1.4 | 33.7 $\pm$ 2.0 |
| 3             | 100.0 $\pm$ 4.2 | 100.3 $\pm$ 2.7 | 79.5 $\pm$ 3.2 | 58.8 $\pm$ 2.4 | 49.8 $\pm$ 1.9 | 44.5 $\pm$ 2.5 | 41.8 $\pm$ 2.1 | 26.0 $\pm$ 2.1 | 32.4 $\pm$ 2.7 |
| 4             | 100.0 $\pm$ 5.9 | 100.8 $\pm$ 5.1 | 87.2 $\pm$ 5.6 | 92.8 $\pm$ 4.5 | 81.2 $\pm$ 4.7 | 74.0 $\pm$ 3.6 | 76.7 $\pm$ 2.9 | 78.0 $\pm$ 3.6 | 61.8 $\pm$ 2.1 |
| 5             | 100.0 $\pm$ 2.2 | 100.8 $\pm$ 3.6 | 91.7 $\pm$ 3.5 | 93.2 $\pm$ 4.2 | 79.2 $\pm$ 2.3 | 79.2 $\pm$ 3.0 | 72.9 $\pm$ 3.3 | 70.0 $\pm$ 3.2 | 65.7 $\pm$ 4.2 |
| 6             | 100.0 $\pm$ 2.2 | 96.0 $\pm$ 3.2  | 79.4 $\pm$ 4.5 | 46.2 $\pm$ 3.4 | 26.8 $\pm$ 3.0 | 18.6 $\pm$ 2.3 | 17.5 $\pm$ 2.3 | 19.4 $\pm$ 2.0 | 15.2 $\pm$ 2.0 |
| 7             | 100.0 $\pm$ 3.0 | 88.6 $\pm$ 2.3  | 73.3 $\pm$ 3.2 | 56.3 $\pm$ 3.1 | 39.9 $\pm$ 2.4 | 34.8 $\pm$ 2.6 | 37.7 $\pm$ 3.8 | 37.6 $\pm$ 2.8 | 28.1 $\pm$ 1.8 |
| 8             | 100.0 $\pm$ 6.9 | 100.2 $\pm$ 6.8 | 96.8 $\pm$ 5.6 | 73.4 $\pm$ 5.6 | 49.2 $\pm$ 3.4 | 33.8 $\pm$ 3.2 | 35.5 $\pm$ 3.2 | 40.1 $\pm$ 4.1 | 29.6 $\pm$ 2.7 |
| 9             | 100.0 $\pm$ 4.9 | 87.6 $\pm$ 3.9  | 68.5 $\pm$ 4.0 | 38.3 $\pm$ 4.3 | 23.5 $\pm$ 3.7 | 18.9 $\pm$ 2.9 | 18.7 $\pm$ 2.9 | 19.2 $\pm$ 2.3 | 18.5 $\pm$ 2.1 |
| 10            | 100.0 $\pm$ 3.8 | 87.6 $\pm$ 5.9  | 75.0 $\pm$ 5.1 | 45.8 $\pm$ 5.4 | 31.7 $\pm$ 2.4 | 26.5 $\pm$ 2.1 | 27.8 $\pm$ 1.4 | 26.7 $\pm$ 2.0 | 23.3 $\pm$ 1.7 |
| 11            | 100.0 $\pm$ 3.6 | 96.1 $\pm$ 5.3  | 89.7 $\pm$ 4.2 | 68.4 $\pm$ 4.0 | 61.1 $\pm$ 2.4 | 40.0 $\pm$ 3.0 | 29.8 $\pm$ 2.0 | 33.5 $\pm$ 2.1 | 30.8 $\pm$ 4.4 |

Data was standardized and expressed as mean  $\pm$  SEM (%) of 3 independent experiments with 6 parallel wells per experiment.

**Table S4.** Effect of test compounds on propidium iodide (PI) incorporation.

| $\mu\text{M}$ | 0             | 25            | 50            | 75            | 100           | 125           | 150           | 175           | 200           |
|---------------|---------------|---------------|---------------|---------------|---------------|---------------|---------------|---------------|---------------|
| Idebenone     | 1.0 $\pm$ 0.0 | 1.0 $\pm$ 0.0 | 1.0 $\pm$ 0.1 | 1.4 $\pm$ 0.1 | 1.7 $\pm$ 0.2 | 3.8 $\pm$ 0.1 | 3.1 $\pm$ 0.3 | 3.6 $\pm$ 0.1 | 3.7 $\pm$ 0.1 |
| 1             | 1.0 $\pm$ 0.1 | 1.2 $\pm$ 0.1 | 1.8 $\pm$ 0.1 | 2.7 $\pm$ 0.3 | 4.0 $\pm$ 0.1 | 4.2 $\pm$ 0.3 | 4.0 $\pm$ 0.2 | 4.3 $\pm$ 0.2 | 3.6 $\pm$ 0.1 |
| 2             | 1.0 $\pm$ 0.1 | 1.2 $\pm$ 0.1 | 2.1 $\pm$ 0.3 | 3.1 $\pm$ 0.3 | 3.7 $\pm$ 0.3 | 4.6 $\pm$ 0.7 | 4.6 $\pm$ 0.3 | 3.9 $\pm$ 0.3 | 4.1 $\pm$ 0.3 |
| 3             | 1.0 $\pm$ 0.1 | 1.0 $\pm$ 0.1 | 1.2 $\pm$ 0.2 | 2.4 $\pm$ 0.3 | 3.4 $\pm$ 0.1 | 3.2 $\pm$ 1.2 | 4.5 $\pm$ 0.4 | 4.4 $\pm$ 0.3 | 4.3 $\pm$ 0.4 |
| 4             | 1.0 $\pm$ 0.1 | 1.0 $\pm$ 0.1 | 1.0 $\pm$ 0.1 | 0.8 $\pm$ 0.1 | 1.0 $\pm$ 0.1 | 1.1 $\pm$ 0.2 | 1.4 $\pm$ 0.1 | 1.5 $\pm$ 0.1 | 1.6 $\pm$ 0.3 |
| 5             | 1.0 $\pm$ 0.1 | 1.1 $\pm$ 0.2 | 1.0 $\pm$ 0.0 | 1.1 $\pm$ 0.0 | 1.1 $\pm$ 0.1 | 1.5 $\pm$ 0.0 | 2.0 $\pm$ 0.2 | 3.7 $\pm$ 0.3 | 3.8 $\pm$ 0.3 |
| 6             | 1.0 $\pm$ 0.1 | 1.2 $\pm$ 0.1 | 1.6 $\pm$ 0.2 | 2.6 $\pm$ 0.2 | 3.7 $\pm$ 0.2 | 3.2 $\pm$ 0.1 | 4.2 $\pm$ 0.3 | 4.9 $\pm$ 0.4 | 4.6 $\pm$ 0.4 |
| 7             | 1.0 $\pm$ 0.1 | 1.1 $\pm$ 0.1 | 1.4 $\pm$ 0.2 | 1.7 $\pm$ 0.2 | 2.9 $\pm$ 0.2 | 3.9 $\pm$ 0.2 | 4.5 $\pm$ 0.4 | 3.4 $\pm$ 0.2 | 3.8 $\pm$ 0.5 |
| 8             | 1.0 $\pm$ 0.1 | 0.9 $\pm$ 0.1 | 1.0 $\pm$ 0.1 | 1.2 $\pm$ 0.1 | 1.4 $\pm$ 0.1 | 3.8 $\pm$ 0.2 | 3.8 $\pm$ 0.4 | 3.1 $\pm$ 0.4 | 3.1 $\pm$ 0.1 |
| 9             | 1.0 $\pm$ 0.1 | 0.9 $\pm$ 0.1 | 1.4 $\pm$ 0.1 | 3.0 $\pm$ 0.2 | 3.8 $\pm$ 0.2 | 5.0 $\pm$ 0.2 | 4.7 $\pm$ 0.5 | 4.6 $\pm$ 0.5 | 3.4 $\pm$ 0.2 |
| 10            | 1.0 $\pm$ 0.1 | 0.9 $\pm$ 0.1 | 1.0 $\pm$ 0.1 | 2.5 $\pm$ 0.2 | 3.1 $\pm$ 0.2 | 4.2 $\pm$ 0.3 | 4.3 $\pm$ 0.3 | 3.8 $\pm$ 0.5 | 4.1 $\pm$ 0.5 |
| 11            | 1.0 $\pm$ 0.1 | 0.7 $\pm$ 0.1 | 1.2 $\pm$ 0.2 | 0.8 $\pm$ 0.1 | 0.8 $\pm$ 0.1 | 1.7 $\pm$ 0.1 | 3.0 $\pm$ 0.3 | 3.7 $\pm$ 0.2 | 3.6 $\pm$ 0.5 |

Data was standardized and expressed as mean  $\pm$  SEM (fold) of 3 independent experiments with 4 parallel wells per experiment.

**Table S5.** Effect of test compounds on necrotic-cell protease activity.

| $\mu\text{M}$ | 0             | 25            | 50            | 75            | 100           | 125           | 150           | 175           | 200           |
|---------------|---------------|---------------|---------------|---------------|---------------|---------------|---------------|---------------|---------------|
| Idebenone     | $1.0 \pm 0.0$ | $0.9 \pm 0.1$ | $1.0 \pm 0.1$ | $1.0 \pm 0.1$ | $1.7 \pm 0.3$ | $1.7 \pm 0.6$ | $1.1 \pm 0.1$ | $0.8 \pm 0.1$ | $0.2 \pm 0.2$ |
| 1             | $1.0 \pm 0.0$ | $1.5 \pm 0.1$ | $1.7 \pm 0.1$ | $1.8 \pm 0.2$ | $1.4 \pm 0.2$ | $1.4 \pm 0.4$ | $1.5 \pm 0.3$ | $1.4 \pm 0.3$ | $1.3 \pm 0.4$ |
| 2             | $1.0 \pm 0.0$ | $1.5 \pm 0.1$ | $1.6 \pm 0.2$ | $1.7 \pm 0.2$ | $1.7 \pm 0.2$ | $1.9 \pm 0.6$ | $1.6 \pm 0.5$ | $1.0 \pm 0.2$ | $0.8 \pm 0.1$ |
| 3             | $1.0 \pm 0.0$ | $1.7 \pm 0.2$ | $2.0 \pm 0.3$ | $2.0 \pm 0.3$ | $1.6 \pm 0.2$ | $1.7 \pm 0.4$ | $1.3 \pm 0.3$ | $0.7 \pm 0.1$ | $0.7 \pm 0.2$ |
| 4             | $1.0 \pm 0.0$ | $0.9 \pm 0.1$ | $0.8 \pm 0.1$ | $1.3 \pm 0.2$ | $0.9 \pm 0.1$ | $1.3 \pm 0.3$ | $1.0 \pm 0.1$ | $0.8 \pm 0.2$ | $0.9 \pm 0.2$ |
| 5             | $1.0 \pm 0.0$ | $0.6 \pm 0.1$ | $1.0 \pm 0.1$ | $1.5 \pm 0.2$ | $1.9 \pm 0.5$ | $1.6 \pm 0.2$ | $1.2 \pm 0.2$ | $1.2 \pm 0.3$ | $1.3 \pm 0.3$ |
| 6             | $1.0 \pm 0.0$ | $1.4 \pm 0.2$ | $1.4 \pm 0.1$ | $1.5 \pm 0.2$ | $1.2 \pm 0.3$ | $2.0 \pm 0.4$ | $2.1 \pm 0.6$ | $1.8 \pm 0.5$ | $1.8 \pm 0.6$ |
| 7             | $1.0 \pm 0.0$ | $1.3 \pm 0.1$ | $1.6 \pm 0.2$ | $1.5 \pm 0.2$ | $1.8 \pm 0.4$ | $2.9 \pm 0.8$ | $3.0 \pm 0.7$ | $3.0 \pm 1.8$ | $3.1 \pm 0.6$ |
| 8             | $1.0 \pm 0.0$ | $1.0 \pm 0.1$ | $1.3 \pm 0.2$ | $1.4 \pm 0.1$ | $1.8 \pm 0.3$ | $2.5 \pm 0.4$ | $2.6 \pm 0.4$ | $2.7 \pm 0.5$ | $3.0 \pm 0.7$ |
| 9             | $1.0 \pm 0.0$ | $1.5 \pm 0.1$ | $1.5 \pm 0.2$ | $1.5 \pm 0.2$ | $1.9 \pm 0.4$ | $2.7 \pm 0.5$ | $2.7 \pm 0.5$ | $2.9 \pm 0.9$ | $3.1 \pm 0.7$ |
| 10            | $1.0 \pm 0.0$ | $1.1 \pm 0.1$ | $1.3 \pm 0.1$ | $1.3 \pm 0.2$ | $1.4 \pm 0.3$ | $1.9 \pm 0.3$ | $2.0 \pm 0.3$ | $1.8 \pm 0.2$ | $2.0 \pm 0.5$ |
| 11            | $1.0 \pm 0.0$ | $1.1 \pm 0.2$ | $1.2 \pm 0.1$ | $1.2 \pm 0.2$ | $1.7 \pm 0.3$ | $2.4 \pm 0.2$ | $2.5 \pm 0.4$ | $2.3 \pm 0.5$ | $2.5 \pm 0.8$ |

Data was standardized and expressed as mean  $\pm$  SEM (fold) of 3 independent experiments with 4 parallel wells per experiment.

**Table S6.** Effect of test compounds on viable-cell protease activity.

| $\mu\text{M}$ | 0               | 25              | 50              | 75              | 100             | 125             | 150            | 175            | 200            |
|---------------|-----------------|-----------------|-----------------|-----------------|-----------------|-----------------|----------------|----------------|----------------|
| Idebenone     | $100.0 \pm 1.5$ | $106.0 \pm 7.2$ | $84.7 \pm 8.8$  | $54.8 \pm 11.6$ | $41.9 \pm 7.5$  | $27.0 \pm 6.1$  | $21.5 \pm 2.8$ | $21.5 \pm 4.1$ | $25.9 \pm 6.7$ |
| 1             | $100.0 \pm 1.5$ | $92.6 \pm 8.9$  | $64.7 \pm 9.5$  | $52.8 \pm 7.7$  | $36.8 \pm 6.0$  | $32.5 \pm 7.8$  | $32.9 \pm 5.2$ | $32.0 \pm 5.5$ | $30.5 \pm 5.1$ |
| 2             | $100.0 \pm 1.5$ | $80.8 \pm 8.6$  | $59.2 \pm 7.7$  | $42.2 \pm 6.2$  | $30.7 \pm 5.1$  | $30.9 \pm 6.5$  | $27.9 \pm 5.3$ | $23.2 \pm 2.3$ | $24.8 \pm 4.7$ |
| 3             | $100.0 \pm 1.5$ | $91.7 \pm 6.8$  | $65.9 \pm 10.1$ | $53.1 \pm 8.8$  | $37.6 \pm 6.3$  | $33.7 \pm 7.0$  | $27.8 \pm 5.2$ | $24.9 \pm 3.4$ | $24.1 \pm 3.0$ |
| 4             | $100.0 \pm 1.5$ | $109.9 \pm 6.9$ | $105.0 \pm 8.0$ | $110.9 \pm 7.4$ | $95.2 \pm 8.1$  | $89.3 \pm 13.9$ | $80.3 \pm 9.6$ | $71.6 \pm 5.5$ | $63.9 \pm 9.0$ |
| 5             | $100.0 \pm 1.5$ | $100.0 \pm 6.1$ | $96.6 \pm 9.4$  | $98.6 \pm 9.0$  | $93.6 \pm 10.6$ | $73.6 \pm 12.6$ | $64.0 \pm 9.8$ | $60.0 \pm 5.4$ | $43.5 \pm 5.4$ |
| 6             | $100.0 \pm 1.5$ | $85.4 \pm 7.1$  | $55.9 \pm 8.2$  | $40.1 \pm 5.7$  | $26.8 \pm 4.2$  | $32.3 \pm 4.9$  | $28.1 \pm 3.2$ | $25.8 \pm 3.1$ | $24.6 \pm 2.3$ |
| 7             | $100.0 \pm 1.5$ | $78.3 \pm 5.7$  | $56.8 \pm 9.6$  | $45.9 \pm 7.2$  | $43.8 \pm 8.7$  | $35.5 \pm 8.7$  | $31.7 \pm 5.0$ | $29.5 \pm 3.4$ | $27.6 \pm 3.9$ |
| 8             | $100.0 \pm 1.5$ | $102.4 \pm 4.1$ | $78.0 \pm 6.0$  | $66.5 \pm 8.7$  | $62.9 \pm 8.2$  | $57.8 \pm 9.1$  | $54.7 \pm 8.6$ | $47.0 \pm 5.2$ | $46.5 \pm 4.8$ |
| 9             | $100.0 \pm 1.5$ | $83.2 \pm 5.5$  | $56.8 \pm 6.8$  | $43.3 \pm 8.0$  | $38.8 \pm 6.8$  | $38.6 \pm 5.8$  | $32.9 \pm 2.8$ | $29.5 \pm 2.6$ | $28.5 \pm 2.2$ |
| 10            | $100.0 \pm 1.5$ | $93.7 \pm 8.2$  | $63.2 \pm 9.9$  | $42.1 \pm 7.3$  | $32.8 \pm 5.8$  | $30.4 \pm 5.3$  | $29.5 \pm 3.5$ | $27.1 \pm 2.5$ | $25.4 \pm 1.7$ |
| 11            | $100.0 \pm 1.5$ | $104.8 \pm 5.6$ | $95.4 \pm 6.5$  | $93.2 \pm 6.9$  | $84.7 \pm 10.1$ | $89.0 \pm 10.9$ | $81.8 \pm 8.2$ | $77.1 \pm 4.3$ | $66.2 \pm 4.4$ |

Data was standardized and expressed as mean  $\pm$  SEM (%) of 3 independent experiments with 4 parallel wells per experiment.

**Table S7.** Effect of test compounds on mitochondrial superoxide production.

| $\mu\text{M}$ | 0             | 25            | 50            | 75            | 100           | 125           | 150           | 175           | 200           |
|---------------|---------------|---------------|---------------|---------------|---------------|---------------|---------------|---------------|---------------|
| Antimycin A   | 1.0 $\pm$ 0.1 | 3.9 $\pm$ 0.7 | 4.8 $\pm$ 0.8 | 5.8 $\pm$ 1.2 | 6.3 $\pm$ 1.2 | 7.5 $\pm$ 1.5 | 7.7 $\pm$ 1.5 | 8.6 $\pm$ 1.7 | 9.0 $\pm$ 1.9 |
| Idebenone     | 1.0 $\pm$ 0.1 | 1.3 $\pm$ 0.2 | 0.9 $\pm$ 0.0 | 0.9 $\pm$ 0.1 | 0.9 $\pm$ 0.0 | 0.9 $\pm$ 0.1 | 0.9 $\pm$ 0.0 | 0.9 $\pm$ 0.1 | 0.9 $\pm$ 0.0 |
| 1             | 1.0 $\pm$ 0.1 | 1.0 $\pm$ 0.1 | 1.0 $\pm$ 0.1 | 1.0 $\pm$ 0.1 | 1.0 $\pm$ 0.1 | 1.1 $\pm$ 0.1 | 1.1 $\pm$ 0.1 | 1.2 $\pm$ 0.1 | 1.2 $\pm$ 0.1 |
| 2             | 1.0 $\pm$ 0.1 | 1.1 $\pm$ 0.1 | 1.0 $\pm$ 0.1 | 1.0 $\pm$ 0.1 | 1.0 $\pm$ 0.1 | 1.0 $\pm$ 0.1 | 1.0 $\pm$ 0.1 | 1.0 $\pm$ 0.0 | 1.0 $\pm$ 0.1 |
| 3             | 1.0 $\pm$ 0.1 | 1.0 $\pm$ 0.1 | 1.0 $\pm$ 0.1 | 1.0 $\pm$ 0.0 | 1.0 $\pm$ 0.1 | 1.0 $\pm$ 0.1 | 1.0 $\pm$ 0.1 | 1.0 $\pm$ 0.1 | 1.0 $\pm$ 0.1 |
| 4             | 1.0 $\pm$ 0.1 | 1.4 $\pm$ 0.2 | 1.1 $\pm$ 0.1 | 1.0 $\pm$ 0.0 | 1.1 $\pm$ 0.1 | 1.1 $\pm$ 0.1 | 1.1 $\pm$ 0.1 | 1.1 $\pm$ 0.1 | 1.1 $\pm$ 0.1 |
| 5             | 1.0 $\pm$ 0.1 | 1.2 $\pm$ 0.1 | 1.2 $\pm$ 0.1 | 1.2 $\pm$ 0.1 | 1.2 $\pm$ 0.1 | 1.3 $\pm$ 0.1 | 1.4 $\pm$ 0.1 | 1.4 $\pm$ 0.1 | 1.5 $\pm$ 0.1 |
| 6             | 1.0 $\pm$ 0.1 | 1.1 $\pm$ 0.1 | 1.1 $\pm$ 0.0 | 1.0 $\pm$ 0.1 | 1.0 $\pm$ 0.1 | 1.0 $\pm$ 0.1 | 1.0 $\pm$ 0.1 | 1.0 $\pm$ 0.1 | 1.0 $\pm$ 0.1 |
| 7             | 1.0 $\pm$ 0.1 | 1.0 $\pm$ 0.1 | 1.0 $\pm$ 0.1 | 1.0 $\pm$ 0.1 | 1.0 $\pm$ 0.1 | 1.0 $\pm$ 0.1 | 1.0 $\pm$ 0.1 | 1.0 $\pm$ 0.1 | 1.0 $\pm$ 0.1 |
| 8             | 1.0 $\pm$ 0.1 | 1.3 $\pm$ 0.1 | 1.3 $\pm$ 0.1 | 1.4 $\pm$ 0.1 | 1.5 $\pm$ 0.2 | 1.6 $\pm$ 0.2 | 1.8 $\pm$ 0.2 | 1.9 $\pm$ 0.3 | 2.0 $\pm$ 0.3 |
| 9             | 1.0 $\pm$ 0.1 | 1.0 $\pm$ 0.1 | 1.1 $\pm$ 0.2 | 1.0 $\pm$ 0.1 | 1.0 $\pm$ 0.1 | 1.0 $\pm$ 0.1 | 1.0 $\pm$ 0.1 | 1.0 $\pm$ 0.1 | 1.0 $\pm$ 0.1 |
| 10            | 1.0 $\pm$ 0.1 | 1.1 $\pm$ 0.1 | 1.0 $\pm$ 0.1 | 1.1 $\pm$ 0.1 | 1.1 $\pm$ 0.1 | 1.1 $\pm$ 0.1 | 1.1 $\pm$ 0.1 | 1.2 $\pm$ 0.1 | 1.1 $\pm$ 0.1 |
| 11            | 1.0 $\pm$ 0.1 | 1.2 $\pm$ 0.1 | 1.3 $\pm$ 0.1 | 1.4 $\pm$ 0.1 | 1.6 $\pm$ 0.2 | 1.8 $\pm$ 0.2 | 2.0 $\pm$ 0.2 | 2.2 $\pm$ 0.3 | 2.2 $\pm$ 0.3 |

Data was standardized and expressed as mean  $\pm$  SEM (fold) of 3 independent experiments with 8 parallel wells per experiment.

**Table S8.** Effect of test compounds on colony formation.

| $\mu\text{M}$ | 0               | 5              | 10             | 15             | 20             | 40             | 60            | 80            | 100           |
|---------------|-----------------|----------------|----------------|----------------|----------------|----------------|---------------|---------------|---------------|
| Idebenone     | 100.0 $\pm$ 2.7 | 95.3 $\pm$ 4.3 | 84.6 $\pm$ 4.5 | 70.3 $\pm$ 4.2 | 68.3 $\pm$ 6.0 | 18.4 $\pm$ 3.1 | 0.7 $\pm$ 0.3 | 0.0 $\pm$ 0.0 | 0.0 $\pm$ 0.0 |
| 1             | 100.0 $\pm$ 4.2 | 58.5 $\pm$ 5.2 | 14.8 $\pm$ 6.2 | 11.3 $\pm$ 4.9 | 2.5 $\pm$ 1.2  | 0.0 $\pm$ 0.0  | 0.0 $\pm$ 0.0 | 0.0 $\pm$ 0.0 | 0.0 $\pm$ 0.0 |
| 2             | 100.0 $\pm$ 4.2 | 31.7 $\pm$ 2.7 | 0.1 $\pm$ 0.1  | 0.0 $\pm$ 0.0  | 0.0 $\pm$ 0.0  | 0.0 $\pm$ 0.0  | 0.0 $\pm$ 0.0 | 0.0 $\pm$ 0.0 | 0.0 $\pm$ 0.0 |
| 3             | 100.0 $\pm$ 2.6 | 59.8 $\pm$ 5.4 | 33.1 $\pm$ 6.4 | 10.0 $\pm$ 2.6 | 4.8 $\pm$ 1.0  | 0.1 $\pm$ 0.1  | 0.0 $\pm$ 0.0 | 0.0 $\pm$ 0.0 | 0.0 $\pm$ 0.0 |
| 4             | 100.0 $\pm$ 3.1 | 97.6 $\pm$ 4.0 | 92.7 $\pm$ 6.9 | 88.0 $\pm$ 5.6 | 72.3 $\pm$ 6.7 | 32.8 $\pm$ 6.1 | 5.6 $\pm$ 2.2 | 1.0 $\pm$ 0.4 | 0.1 $\pm$ 0.1 |
| 5             | 100.0 $\pm$ 4.5 | 96.2 $\pm$ 5.1 | 82.7 $\pm$ 8.4 | 60.3 $\pm$ 5.5 | 41.0 $\pm$ 6.2 | 24.2 $\pm$ 5.0 | 8.7 $\pm$ 1.6 | 1.2 $\pm$ 0.5 | 0.2 $\pm$ 0.1 |
| 6             | 100.0 $\pm$ 4.6 | 46.3 $\pm$ 7.4 | 6.8 $\pm$ 2.6  | 1.6 $\pm$ 0.7  | 1.3 $\pm$ 0.5  | 0.1 $\pm$ 0.1  | 0.3 $\pm$ 0.2 | 0.2 $\pm$ 0.2 | 0.0 $\pm$ 0.0 |
| 7             | 100.0 $\pm$ 5.3 | 35.1 $\pm$ 5.6 | 3.8 $\pm$ 1.0  | 0.7 $\pm$ 0.3  | 0.3 $\pm$ 0.1  | 0.1 $\pm$ 0.1  | 0.0 $\pm$ 0.0 | 0.0 $\pm$ 0.0 | 0.0 $\pm$ 0.0 |
| 8             | 100.0 $\pm$ 5.2 | 74.8 $\pm$ 6.9 | 34.4 $\pm$ 5.1 | 12.8 $\pm$ 3.0 | 3.4 $\pm$ 1.0  | 0.3 $\pm$ 0.2  | 0.0 $\pm$ 0.0 | 0.0 $\pm$ 0.0 | 0.0 $\pm$ 0.0 |
| 9             | 100.0 $\pm$ 3.7 | 62.8 $\pm$ 6.7 | 7.2 $\pm$ 1.9  | 2.0 $\pm$ 0.6  | 0.5 $\pm$ 0.3  | 0.4 $\pm$ 0.3  | 0.3 $\pm$ 0.2 | 0.0 $\pm$ 0.0 | 0.0 $\pm$ 0.0 |
| 10            | 100.0 $\pm$ 2.8 | 50.2 $\pm$ 5.1 | 11.0 $\pm$ 2.7 | 5.8 $\pm$ 2.0  | 2.3 $\pm$ 0.7  | 0.4 $\pm$ 0.3  | 0.2 $\pm$ 0.1 | 0.0 $\pm$ 0.0 | 0.1 $\pm$ 0.1 |
| 11            | 100.0 $\pm$ 4.0 | 75.2 $\pm$ 4.3 | 27.1 $\pm$ 3.4 | 12.8 $\pm$ 1.8 | 3.8 $\pm$ 1.0  | 0.2 $\pm$ 0.1  | 0.0 $\pm$ 0.0 | 0.0 $\pm$ 0.0 | 0.0 $\pm$ 0.0 |

Data was standardized and expressed as mean  $\pm$  SEM (%) of 3 independent experiments with 4 parallel wells per experiment.
